# Supplementary material for: Single Nucleotide Polymorphisms in Cellular Drug Transporters Are Associated with Intolerance to Antiretroviral Therapy in Brazilian HIV-1 Positive Individuals
Source: PLoS One. 2016 Sep 20;11(9):e0163170. doi: 10.1371/journal.pone.0163170 (PMC5029869; doi:10.1371/journal.pone.0163170)
Supplement: S1 Table — (XLSX) [file pone.0163170.s001.xlsx]

## Sheet: Plan1
S1 Table: Candidate genes and SNPs selected for case-control analysis.
dbSNP rs ID	Gene	Chromosome	Position a	Variation b	MAF c	Pass HWE?
rs673548	APOB	2	21237544	G>A	0.226	YES
rs11126598	APOB	2	21240364	G>A	0.23	YES
rs10199768	APOB	2	21244000	G>T	0.299	YES
rs4124874	UGT1A3	2	234665659	C>A	0.377	YES
rs4399719	UGT1A3	2	234666461	G>T	0.377	YES
rs3755319	UGT1A3	2	234667582	G>T	0.421	YES
rs2003569	UGT1A1	2	234667937	G>A	0.212	YES
rs887829	UGT1A1	2	234668570	G>A	0.369	YES
rs4148323	UGT1A1	2	234669144	G>A	0.000	monomorfic
rs72551344	UGT1A1	2	234669631	T>G	0.000	monomorfic
rs17868341	UGT1A1	2	234669886	C>T	0.043	YES
rs11563252	UGT1A1	2	234673242	C>T	0.000	monomorfic
rs4148325	UGT1A1	2	234673309	C>T	0.37	YES
rs10445705	UGT1A1	2	234676787	G>A	0.031	YES
rs4148328	UGT1A1	2	234677659	C>T	0.251	YES
rs11563070	UGT1A1	2	234678953	G>A	0.009	YES
rs10929303	UGT1A1	2	234681416	C>T	0.332	YES
rs3814055	NR1I2	3	119500035	C>T	0.29	YES
rs3842689	NR1I2	3	119501400	G>C	0.292	YES
rs4687887	NR1I2	3	119515585	A>G	0.149	YES
rs4440154	NR1I2	3	119518898	T>C	0.382	NO
rs13059232	NR1I2	3	119521055	C>T	0.43	YES
rs2461817	NR1I2	3	119524651	G>T	0.499	YES
rs7643645	NR1I2	3	119525497	A>G	0.279	YES
rs2461816	NR1I2	3	119527760	G>A	0.116	YES
rs2472681	NR1I2	3	119529689	T>C	0.484	YES
rs12721608	NR1I2	3	119530419	G>T>A	0.000	monomorfic
rs3732357	NR1I2	3	119530858	A>G	0.487	YES
rs6785049	NR1I2	3	119533733	G>A	0.355	YES
rs2276707	NR1I2	3	119534153	C>T	0.282	YES
rs72551375	NR1I2	3	119534659	C>T	0.000	monomorfic
rs11929668	NR1I2	3	119535795	C>G	0.149	YES
rs72551376	NR1I2	3	119535961	A>G	0.000	monomorfic
rs11940316	UGT2B7	4	69961127	C>T	0.363	YES
rs7662029	UGT2B7	4	69961912	G>A	0.363	YES
rs12233719	UGT2B7	4	69962449	G>T	0.004	YES
rs6858558	UGT2B7	4	69969543	T>C	0.336	YES
rs10028494	UGT2B7	4	69970937	A>C	0.138	YES
rs3924194	UGT2B7	4	69971092	C>G	0.056	YES
rs7435335	UGT2B7	4	69971335	G>A	0.223	YES
rs4356975	UGT2B7	4	69972463	C>T	0.396	YES
rs6600893	UGT2B7	4	69978901	C>T	0.341	YES
rs2231164	ABCG2	4	89015857	A>G	0.454	NO
rs4148157	ABCG2	4	89020934	C>T	0.067	YES
rs2622628	ABCG2	4	89029252	G>T	0.246	YES
rs13120400	ABCG2	4	89033527	T>C	0.164	YES
rs2725256	ABCG2	4	89050998	T>C	0.324	YES
rs2231142	ABCG2	4	89052323	C>A	0.069	YES
rs72552713	ABCG2	4	89052957	G>A	0.000	monomorfic
rs17731538	ABCG2	4	89055379	G>A	0.115	YES
rs4148152	ABCG2	4	89060909	A>G	0.095	YES
rs2231137	ABCG2	4	89061114	A>G	0.441	NO
rs1564481	ABCG2	4	89061265	C>T	0.252	YES
rs13137622	ABCG2	4	89062513	G>T	0.381	YES
rs3109823	ABCG2	4	89064602	A>G	0.406	YES
rs2622624	ABCG2	4	89069406	A>G	0.344	YES
rs2622604	ABCG2	4	89078924	C>T	0.16	YES
rs3219191	ABCG2	4	89080717	A>T	0.333	YES
rs3114020	ABCG2	4	89083666	T>C	0.335	YES
rs700008	ABCC10	6	43399837	G>A	0.149	YES
rs45480693	ABCC10	6	43400500	G>A	0.011	NO
rs9394952	ABCC10	6	43401105	G>A	0.278	YES
rs831314	ABCC10	6	43401826	T>C	0.149	YES
rs831313	ABCC10	6	43401888	C>T	0.111	YES
rs9349256	ABCC10	6	43404511	G>A	0.278	YES
rs831311	ABCC10	6	43405665	G>A	0.037	YES
rs2277122	ABCC10	6	43406501	C>T	0.033	YES
rs2487663	ABCC10	6	43409418	G>A	0.355	NO
rs41271275	ABCC10	6	43410832	G>A	0.000	monomorfic
rs41281802	ABCC10	6	43412082	C>T	0.011	YES
rs2125739	ABCC10	6	43412865	T>C	0.046	NO
rs2125740	ABCC10	6	43412935	T>C	0.087	YES
rs41281804	ABCC10	6	43413553	C>T	0.000	monomorfic
rs6899549	SLC22A1	6	160542819	T>C	0.01	YES
rs461473	SLC22A1	6	160543562	G>A	0.088	YES
rs683369	SLC22A1	6	160551204	C>G	0.099	YES
rs36103319	SLC22A1	6	160553407	G>T	0.001	YES
rs4646278	SLC22A1	6	160557271	C>T	0.000	monomorfic
rs2282143	SLC22A1	6	160557643	C>T	0.047	YES
rs628031	SLC22A1	6	160560845	G>A	0.305	YES
rs9457843	SLC22A1	6	160560933	C>T	0.123	YES
rs3798167	SLC22A1	6	160567928	C>A	0.176	YES
rs2197296	SLC22A1	6	160568997	C>T	0.213	YES
rs715083	SLC22A1	6	160573292	A>C	0.000	monomorfic
rs34059508	SLC22A1	6	160575837	G>A	0.006	YES
rs622591	SLC22A1	6	160579527	G>A	0.294	YES
rs316003	SLC22A2	6	160645832	T>C	0.383	YES
rs17588242	SLC22A2	6	160663230	T>C	0.164	YES
rs8177517	SLC22A2	6	160663420	A>C	0.011	YES
rs8177516	SLC22A2	6	160664685	C>T	0.008	YES
rs315995	SLC22A2	6	160665461	A>G	0.376	YES
rs316019	SLC22A2	6	160670282	G>T	0.135	YES
rs8177507	SLC22A2	6	160677669	C>T	0.006	NO
rs624249	SLC22A2	6	160679400	C>A	0.314	YES
rs8187715	SLC22A3	6	160769582	C>T	0.034	YES
rs377551	SLC22A3	6	160781733	G>A	0.396	YES
rs3123634	SLC22A3	6	160802239	C>T	0.424	YES
rs884742	SLC22A3	6	160807432	G>T	0.422	YES
rs2221750	SLC22A3	6	160808447	G>A	0.27	YES
rs7740824	SLC22A3	6	160808901	G>T	0.145	YES
rs1567441	SLC22A3	6	160812262	A>G	0.135	YES
rs9364554	SLC22A3	6	160833664	C>T	0.15	YES
rs2457571	SLC22A3	6	160834828	C>T	0.313	YES
rs2292334	SLC22A3	6	160858188	C>T	0.26	YES
rs2048327	SLC22A3	6	160863532	A>G	0.228	YES
rs2457576	SLC22A3	6	160865619	C>G	0.255	YES
rs2457574	SLC22A3	6	160868701	C>T	0.41	YES
rs1810126	SLC22A3	6	160872151	G>A	0.017	YES
rs3088442	SLC22A3	6	160872652	G>A	0.23	YES
rs3842	ABCB1	7	87133366	A>G	0.147	YES
rs72552784	ABCB1	7	87145914	C>T	0.000	monomorfic
rs2235067	ABCB1	7	87149922	G>A	0.161	YES
rs4148737	ABCB1	7	87171152	A>G	0.425	YES
rs6961419	ABCB1	7	87172136	T>C	0.424	YES
rs2235046	ABCB1	7	87174066	G>A	0.358	YES
rs2235013	ABCB1	7	87178626	A>G	0.486	YES
rs2235033	ABCB1	7	87179143	C>T	0.488	YES
rs10276036	ABCB1	7	87180198	T>C	0.342	YES
rs2235015	ABCB1	7	87199564	G>T	0.259	YES
rs10264990	ABCB1	7	87202615	T>C	0.022	YES
rs3789243	ABCB1	7	87220886	C>T	0.5	YES
rs3214119	ABCB1	7	87229580	G>A	0.067	YES
rs3213619	ABCB1	7	87230193	T>C	0.065	YES
rs10246878	ABCB1	7	87275641	G>A	0.136	YES
rs4646458	CYP3A5	7	99245013	A>C	0.219	YES
rs4646457	CYP3A5	7	99245080	T>G	0.38	NO
rs15524	CYP3A5	7	99245914	T>C	0.314	YES
rs10249369	CYP3A5	7	99246992	A>G	0.049	YES
rs6976017	CYP3A5	7	99249999	G>A	0.078	YES
rs28365083	CYP3A5	7	99250236	C>A	0.004	YES
rs28383479	CYP3A5	7	99258139	G>A	0.000	monomorfic
rs10247580	CYP3A5	7	99258524	G>A	0.033	YES
rs10264272	CYP3A5	7	99262835	C>T	0.047	YES
rs55965422	CYP3A5	7	99264573	A>T>G	0.000	monomorfic
rs4646450	CYP3A5	7	99266318	C>T	0.244	NO
rs4646447	CYP3A5	7	99268390	G>A	0.081	YES
rs56244447	CYP3A5	7	99270276	A>C	0.000	monomorfic
rs776746	CYP3A5	7	99270539	G>A	0.376	NO
rs72552791	CYP3A5	7	99273745	A>G	0.000	monomorfic
rs6945984	CYP3A4	7	99348328	C>T	0.451	NO
rs12333983	CYP3A4	7	99354114	T>A	0.395	YES
rs3735451	CYP3A4	7	99355975	G>A	0.233	NO
rs17161888	CYP3A4	7	99357369	G>A	0.021	YES
rs4986910	CYP3A4	7	99358524	T>C	0.000	monomorfic
rs12721620	CYP3A4	7	99358615	C>T	0.115	YES
rs4986909	CYP3A4	7	99359670	C>G>T	0.000	monomorfic
rs4646440	CYP3A4	7	99360870	C>T	0.096	YES
rs2242480	CYP3A4	7	99361466	C>T	0.438	NO
rs10267228	CYP3A4	7	99363813	G>C	0.077	YES
rs4646438	CYP3A4	7	99364034	C>A	0.000	monomorfic
rs4646437	CYP3A4	7	99365083	C>T	0.386	YES
rs2687117	CYP3A4	7	99365451	C>T	0.142	YES
rs35599367	CYP3A4	7	99366316	C>T	0.043	NO
rs2738258	CYP3A4	7	99370493	G>A	0.151	YES
rs2740574	CYP3A4	7	99382096	A>G	0.293	NO
rs4986914	CYP3A4	7	99382233	T>C	0.031	YES
rs1851426	CYP3A4	7	99382936	C>T	0.309	NO
rs2740484	ABCA1	9	107551180	G>A	0.246	YES
rs2297406	ABCA1	9	107551538	C>T	0.156	NO
rs2230808	ABCA1	9	107562804	G>A	0.47	NO
rs2740479	ABCA1	9	107563437	C>T	0.404	NO
rs2254884	ABCA1	9	107581749	A>C	0.226	YES
rs2066714	ABCA1	9	107586753	A>G	0.342	YES
rs2515629	ABCA1	9	107594364	T>C	0.13	YES
rs2065412	ABCA1	9	107598740	T>C	0.322	NO
rs2472386	ABCA1	9	107601541	T>C	0.473	YES
rs4149297	ABCA1	9	107604104	T>C	0.068	YES
rs2253174	ABCA1	9	107620332	G>A	0.494	YES
rs2230806	ABCA1	9	107620867	G>A	0.441	YES
rs2000069	ABCA1	9	107635869	T>C	0.407	YES
rs2777786	ABCA1	9	107661561	G>C	0.457	YES
rs10820743	ABCA1	9	107671659	T>C	0.253	YES
rs2472377	ABCA1	9	107687104	G>A	0.432	YES
rs2472507	ABCA1	9	107687193	T>G	0.156	YES
rs28399504	CYP2C19	10	96522463	A>G	0.002	YES
rs12768009	CYP2C19	10	96525865	G>A	0.136	YES
rs4986893	CYP2C19	10	96540410	G>A	0.000	monomorfic
rs6413438	CYP2C19	10	96541615	C>T	0.001	YES
rs72558186	CYP2C19	10	96541756	T>C>A	0.000	monomorfic
rs1322179	CYP2C19	10	96575242	G>A	0.127	YES
rs12779363	CYP2C19	10	96612040	G>A	0.177	YES
rs56337013	CYP2C19	10	96612495	C>T	0.000	monomorfic
rs55640102	CYP2C19	10	96612671	A>C	0.000	monomorfic
rs717620	ABCC2	10	101542578	G>A	0.108	YES
rs4148386	ABCC2	10	101548468	G>A	0.173	NO
rs2804400	ABCC2	10	101553259	G>A	0.329	YES
rs2804398	ABCC2	10	101558634	T>A	0.294	YES
rs7080681	ABCC2	10	101560169	G>A	0.045	YES
rs2273697	ABCC2	10	101563815	G>A	0.181	YES
rs17222589	ABCC2	10	101564023	C>T	0.000	monomorfic
rs2756112	ABCC2	10	101566179	G>A	0.051	YES
rs2073337	ABCC2	10	101567426	A>G	0.378	YES
rs56199535	ABCC2	10	101578577	C>T	0.000	monomorfic
rs56220353	ABCC2	10	101578641	C>T	0.000	monomorfic
rs4148396	ABCC2	10	101591944	C>T	0.295	YES
rs4148397	ABCC2	10	101592320	G>A	0.416	YES
rs17222723	ABCC2	10	101595996	T>A	0.067	YES
rs3758395	ABCC2	10	101602004	A>G	0.062	YES
rs17216177	ABCC2	10	101603522	T>C	0.163	NO
rs3740066	ABCC2	10	101604207	G>A	0.279	YES
rs3740065	ABCC2	10	101605693	T>C	0.172	YES
rs56296335	ABCC2	10	101610393	G>A	0.000	monomorfic
rs8187707	ABCC2	10	101610533	C>T	0.047	YES
rs8187710	ABCC2	10	101611294	G>A	0.101	YES
rs12293329	SLC22A6	11	62746840	G>A	0.097	NO
rs2276300	SLC22A6	11	62748699	G>A	0.000	monomorfic
rs6591722	SLC22A6	11	62749680	T>A	0.206	YES
rs2097073	SLC22A6	11	62750104	A>C	0.006	YES
rs4149172	SLC22A6	11	62750858	A>G	0.349	YES
rs10897312	SLC22A6	11	62751658	G>A	0.208	YES
rs4149170	SLC22A6	11	62752289	G>A	0.21	YES
rs11236359	SLCO2B1	11	74870884	G>A	0.285	YES
rs2712816	SLCO2B1	11	74872576	G>A	0.351	YES
rs949069	SLCO2B1	11	74877573	G>A	0.399	YES
rs1789694	SLCO2B1	11	74881682	A>G	0.36	YES
rs12422149	SLCO2B1	11	74883577	G>A	0.147	YES
rs1676882	SLCO2B1	11	74888262	T>C	0.303	YES
rs1077858	SLCO2B1	11	74901601	A>G	0.42	YES
rs1676885	SLCO2B1	11	74905278	A>G	0.143	YES
rs11823030	SLCO2B1	11	74907204	A>C	0.158	YES
rs2266788	APOA5	11	116660686	T>C	0.068	YES
rs619054	APOA5	11	116660813	C>T	0.219	YES
rs2075291	APOA5	11	116661392	C>T>A	0.000	monomorfic
rs3135506	APOA5	11	116662407	G>C	0.094	YES
rs651821	APOA5	11	116662579	T>C	0.095	YES
rs662799	APOA5	11	116663707	A>G	0.093	YES
rs4520	APOC3	11	116701535	C>T	0.316	YES
rs5128	APOC3	11	116703640	G>C	0.115	YES
rs12228798	SLCO1B3	12	20964557	C>T	0.241	YES
rs7962265	SLCO1B3	12	20964719	A>G	0.366	YES
rs10841661	SLCO1B3	12	20984832	C>T	0.474	YES
rs7310629	SLCO1B3	12	20985287	C>T	0.106	YES
rs4149117	SLCO1B3	12	21011480	G>T	0.35	YES
rs6487160	SLCO1B3	12	21012253	A>G	0.347	YES
rs7311358	SLCO1B3	12	21015760	G>A	0.451	NO
rs6487172	SLCO1B3	12	21044789	T>C	0.422	NO
rs11045585	SLCO1B3	12	21045694	A>G	0.183	YES
rs3834935	SLCO1B3	12	21069528	A>T	0.338	YES
rs4149014	SLCO1B1	12	21282953	T>G	0.086	YES
rs2417955	SLCO1B1	12	21296475	T>A	0.382	NO
rs4149026	SLCO1B1	12	21315415	A>C	0.224	YES
rs10444413	SLCO1B1	12	21317668	T>C	0.124	YES
rs4149032	SLCO1B1	12	21317791	C>T	0.123	NO
rs4149034	SLCO1B1	12	21317922	G>A	0.475	YES
rs56101265	SLCO1B1	12	21325716	T>C	0.000	monomorfic
rs56061388	SLCO1B1	12	21327529	T>C	0.01	YES
rs964614	SLCO1B1	12	21329390	T>C	0.143	NO
rs79135870	SLCO1B1	12	21331891	A>G	0.004	YES
rs11045821	SLCO1B1	12	21332423	G>A	0.105	YES
rs11045854	SLCO1B1	12	21350034	G>A	0.014	YES
rs12310216	SLCO1B1	12	21350547	G>A	0.014	YES
rs55901008	SLCO1B1	12	21353529	T>C	0.000	monomorfic
rs59113707	SLCO1B1	12	21355489	C>G	0.012	YES
rs56387224	SLCO1B1	12	21355583	A>G	0.005	YES
rs72559748	SLCO1B1	12	21358855	A>G	0.000	monomorfic
rs59502379	SLCO1B1	12	21358933	G>C	0.037	YES
rs4149068	SLCO1B1	12	21369191	T>C	0.048	YES
rs11045872	SLCO1B1	12	21372344	A>G	0.172	NO
rs4149081	SLCO1B1	12	21378021	G>A	0.153	YES
rs11045879	SLCO1B1	12	21382619	T>C	0.149	YES
rs12366582	SLCO1B1	12	21391608	A>G	0.151	YES
rs9516519	ABCC4	13	95672457	T>G	0.116	YES
rs1059751	ABCC4	13	95672950	T>C	0.326	YES
rs3742106	ABCC4	13	95673791	A>C	0.364	YES
rs10508024	ABCC4	13	95691692	A>G	0.348	YES
rs9561773	ABCC4	13	95707834	C>T	0.277	YES
rs9561778	ABCC4	13	95713715	G>T	0.12	YES
rs1678387	ABCC4	13	95717906	C>T	0.071	YES
rs1189465	ABCC4	13	95726073	T>C	0.32	YES
rs9561784	ABCC4	13	95762005	A>G	0.257	YES
rs16950650	ABCC4	13	95775432	C>T	0.075	YES
rs3765534	ABCC4	13	95815415	C>T	0.081	NO
rs1678405	ABCC4	13	95829681	C>T	0.473	YES
rs10161985	ABCC4	13	95836254	C>T	0.234	YES
rs1557070	ABCC4	13	95839003	C>T	0.131	YES
rs1611822	ABCC4	13	95842069	C>T	0.326	YES
rs899494	ABCC4	13	95861804	G>A	0.162	YES
rs11568658	ABCC4	13	95863008	G>T	0.025	NO
rs4148454	ABCC4	13	95889505	A>G	0.191	YES
rs10508018	ABCC4	13	95896416	C>T	0.345	YES
rs2389229	ABCC4	13	95919862	G>A	0.313	YES
rs4773866	ABCC4	13	95929326	C>T	0.077	YES
rs215100	ABCC1	16	16054650	T>C	0.409	YES
rs152023	ABCC1	16	16085236	A>G	0.462	YES
rs215072	ABCC1	16	16085551	C>T	0.074	YES
rs119774	ABCC1	16	16086833	G>A	0.041	YES
rs12928602	ABCC1	16	16087496	G>A	0.085	YES
rs11075289	ABCC1	16	16098368	C>T	0.354	YES
rs3784862	ABCC1	16	16110891	A>G	0.31	YES
rs3784863	ABCC1	16	16110955	T>G	0.316	YES
rs246240	ABCC1	16	16119024	A>G	0.141	YES
rs3784864	ABCC1	16	16125325	G>A	0.342	YES
rs903880	ABCC1	16	16130514	C>A	0.46	YES
rs171583	ABCC1	16	16132332	A>G	0.36	YES
rs35587	ABCC1	16	16139714	T>C	0.455	NO
rs35588	ABCC1	16	16139878	A>G	0.432	YES
rs35592	ABCC1	16	16141823	T>C	0.351	NO
rs60782127	ABCC1	16	16142079	G>T	0.006	YES
rs17287570	ABCC1	16	16155103	A>C	0.14	YES
rs4148350	ABCC1	16	16170477	G>T	0.093	YES
rs35626	ABCC1	16	16170615	G>T	0.465	YES
rs35629	ABCC1	16	16171442	C>T	0.281	YES
rs4148356	ABCC1	16	16177275	G>A	0.011	NO
rs2074087	ABCC1	16	16184232	G>C	0.185	YES
rs35529209	ABCC1	16	16205325	G>A	0.001	YES
rs3887893	ABCC1	16	16205501	A>G	0.375	YES
rs2238476	ABCC1	16	16213872	C>T	0.078	YES
rs2299670	ABCC1	16	16220858	A>G	0.494	YES
rs28364006	ABCC1	16	16228249	A>G	0.000	monomorfic
rs212086	ABCC1	16	16229735	G>A	0.126	YES
rs12604031	ABCC3	17	48712705	A>G	0.357	YES
rs2412333	ABCC3	17	48715271	G>A	0.25	YES
rs4794173	ABCC3	17	48725515	A>G	0.418	YES
rs4794174	ABCC3	17	48725604	G>T	0.157	YES
rs4148412	ABCC3	17	48733815	C>T	0.376	YES
rs739923	ABCC3	17	48735774	G>A	0.252	YES
rs733392	ABCC3	17	48736403	G>A	0.238	YES
rs11568605	ABCC3	17	48741080	C>T	0.000	monomorfic
rs11568608	ABCC3	17	48745828	G>A	0.016	YES
rs8075406	ABCC3	17	48749522	T>A	0.348	YES
rs12451302	ABCC3	17	48751164	G>T	0.465	YES
rs11658264	ABCC3	17	48751761	G>A	0.232	YES
rs2240802	ABCC3	17	48755002	G>A	0.269	YES
rs28399456	CYP2A6	19	41350895	C>T	0.000	monomorfic
rs8192729	CYP2A6	19	41350996	G>A	0.067	YES
rs61663607	CYP2A6	19	41357076	T>C	0.088	YES
rs34223104	CYP2B6	19	41497129	T>C	0.021	YES
rs8192709	CYP2B6	19	41497274	C>T	0.064	YES
rs35303484	CYP2B6	19	41497346	A>G	0.000	monomorfic
rs2099361	CYP2B6	19	41498348	T>G	0.219	YES
rs8192712	CYP2B6	19	41500300	T>C	0.07	YES
rs16974796	CYP2B6	19	41500915	A>C	0.068	YES
rs7250601	CYP2B6	19	41503404	A>C	0.323	YES
rs3786547	CYP2B6	19	41506191	T>C	0.316	YES
rs3745274	CYP2B6	19	41512841	G>T	0.3	YES
rs36079186	CYP2B6	19	41512918	T>C	0.000	monomorfic
rs2279345	CYP2B6	19	41515702	C>T	0.317	YES
rs6508965	CYP2B6	19	41517688	C>T	0.314	NO
rs28399499	CYP2B6	19	41518221	T>C	0.062	NO
rs34097093	CYP2B6	19	41518370	C>T	0.138	NO
rs8192719	CYP2B6	19	41518773	C>T	0.301	YES
rs707265	CYP2B6	19	41524087	G>A	0.269	NO
rs1042389	CYP2B6	19	41524153	T>C	0.191	YES
rs445925	APOC1	19	45415640	C>T	0.173	YES
rs1135835	CYP2D6	22	42522662	A>G	0.000	monomorfic
rs28371717	CYP2D6	22	42524310	G>T	0.0101	YES
a Chromosomal positions according to GRCh37.p13 assembly.
b major > minor allele
c minor allele frequencies in our population
HWE: Hardy-Weinberg Equilibrium
